# Supplementary material for: Progranulin-dependent repair function of regulatory T cells drives bone-fracture healing
Source: JCI journal article supplement (doi:10.1172/jci180679), 2024-11-07
Supplement: sd1 [file 1]

301 Moved Permanently

# Moved Permanently

The document has moved here.
